# Supplementary material
Source: PubMed Central journal article supplement (PMC3056578)
Supplement: supp_jn.110.135210_nut135210_sF03l.pdf [file supp_jn.110.135210_nut135210_sF03l.pdf]

ONLINE SUPPORTING MATERIAL

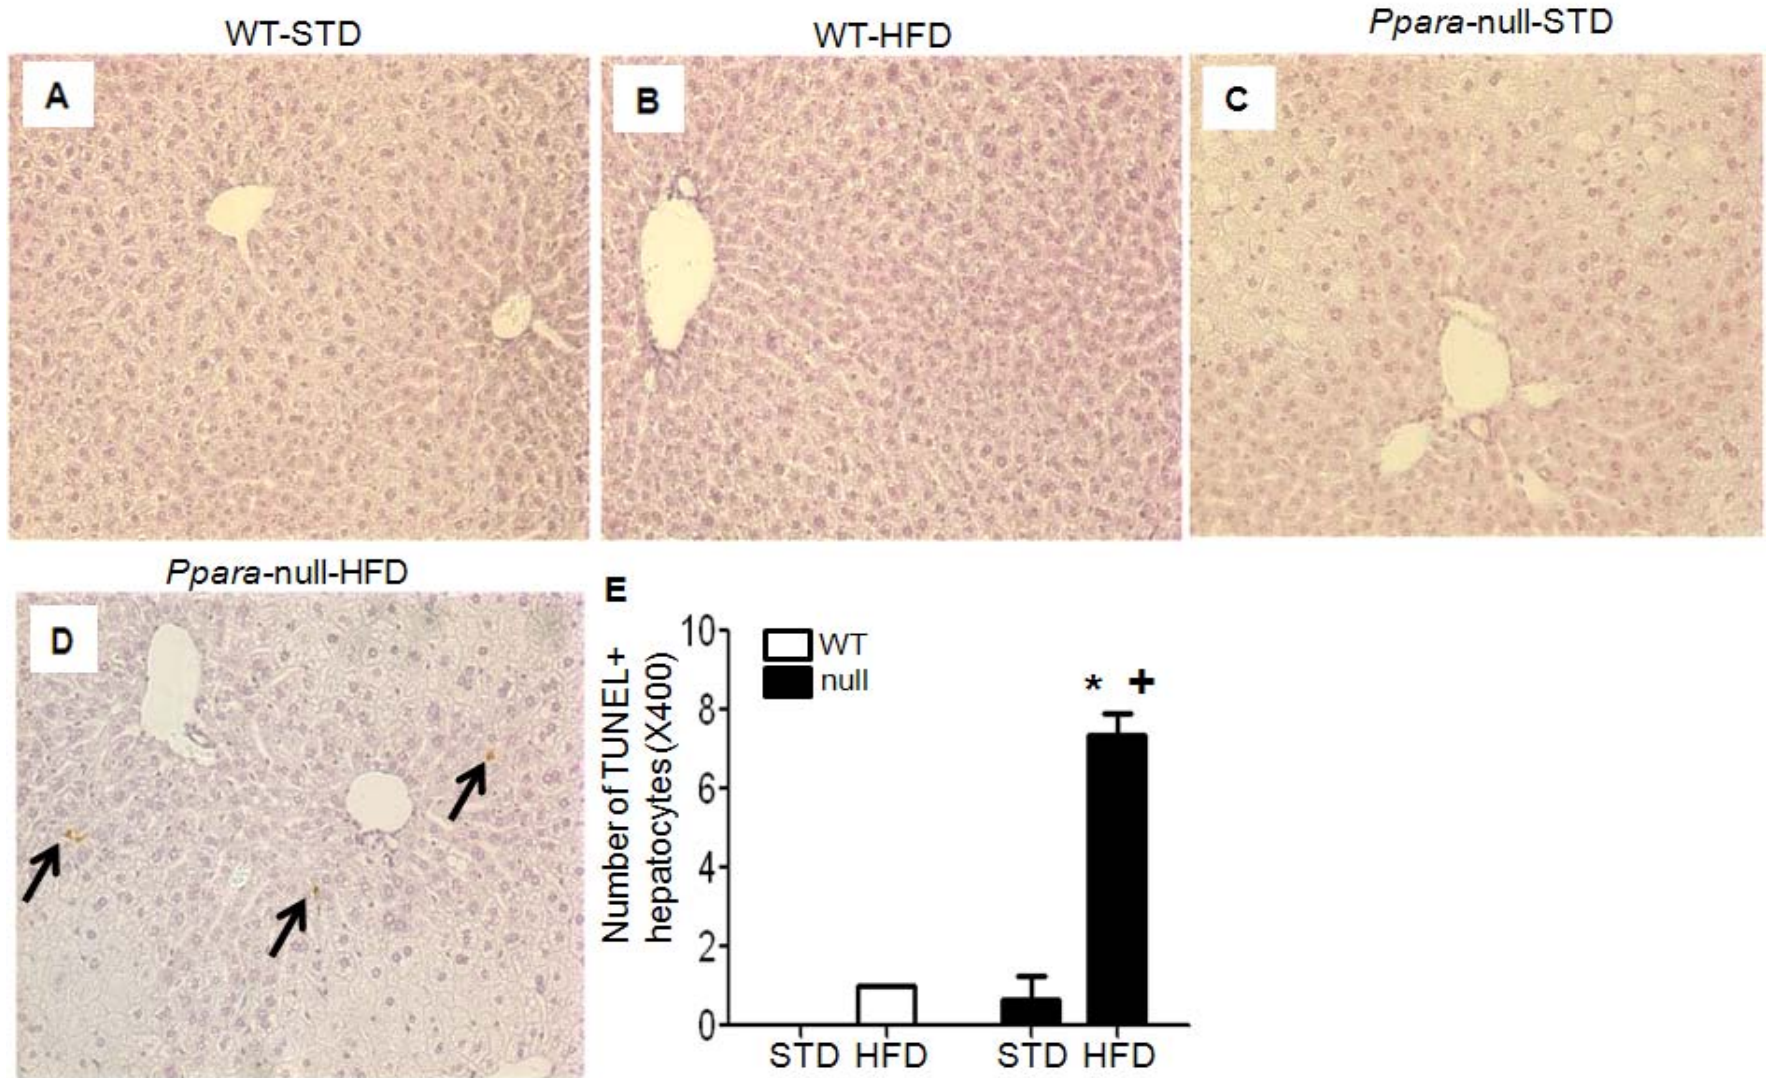

**Supplemental Figure 3.** The color version of Figure 5, describing the increased apoptotic hepatocytes in Null-HFD mice. Apoptotic hepatocytes were detected by using the ApopTag® peroxidase in situ apoptosis detection kit. Black arrows (D) indicate TUNEL-positive hepatocytes in 20 high power fields (X400). Values represent means  $\pm$  S.E.M.,  $n=4$  or 3 (WT-STD). \*, significantly different from the corresponding WT group,  $P=0.05$ . +, significantly different from Null-STD,  $P=0.05$ .
